# Supplementary material
Source: Royal Society of Chemistry journal article supplement (doi:10.1039/d6nj00519e)
Supplement: d6nj00519e1.pdf [file d6nj00519e1.pdf]

## Supplementary Information

### Size control of NiO nanoparticles for hydrogen storage application

Monalisa P. Hansen,<sup>a</sup> Alisson S. Thill,<sup>a</sup> Lucas Assmann,<sup>a</sup> Fabiano Bernardi<sup>a,\*</sup>

<sup>a</sup> Programa de Pós-Graduação em Física, Instituto de Física, Universidade Federal do

Rio Grande do Sul, Brazil. E-mail: [bernardi@if.ufrgs.br](mailto:bernardi@if.ufrgs.br)

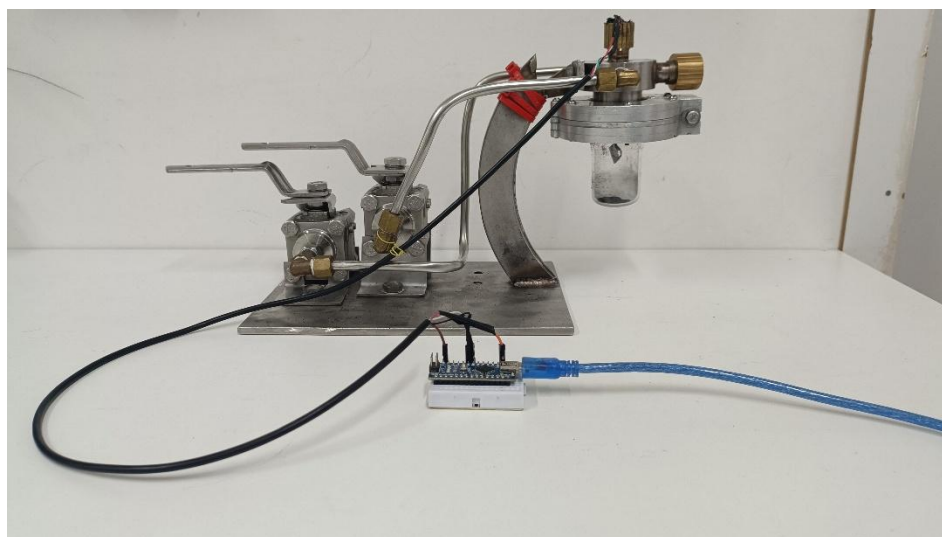

Figure S1 – Picture of the homemade reactor used in the H<sub>2</sub> adsorption reaction measurements.

Table S1 – H<sub>2</sub> amount as a function of time for the reactor without sample.

| Time (min) | P (atm) | T (°C) | H <sub>2</sub> percentage (%) |
|------------|---------|--------|-------------------------------|
| 5          | 1.0037  | 25.3   | 0.9635                        |
| 30         | 1.0092  | 24.0   | 0.9639                        |
| 60         | 1.0117  | 23.7   | 0.9637                        |
| 999        | 1.0095  | 22.7   | 0.9611                        |
| 1003       | 1.0077  | 22.7   | 0.9591                        |
| 1030       | 1.0070  | 22.9   | 0.9565                        |
| 1050       | 1.0054  | 23.0   | 0.9578                        |
| 1060       | 1.0042  | 23.1   | 0.9595                        |

Table S2 – H<sub>2</sub> adsorption measurements of activated carbon.

| Time (min) | P (atm) | T (°C) | H <sub>2</sub> percentage (%) | Weight % |
|------------|---------|--------|-------------------------------|----------|
| 1          | 0.9951  | 21.1   | 0.9579                        | 0.000    |
| 6          | 0.9941  | 21.0   | 0.9549                        | 0.009    |
| 30         | 0.9920  | 20.5   | 0.9576                        | -0.009   |
| 60         | 0.9905  | 20.3   | 0.9563                        | -0.007   |
| 90         | 0.9888  | 20.3   | 0.9561                        | -0.006   |
| 120        | 0.9870  | 20.2   | 0.9556                        | -0.005   |
| 150        | 0.9858  | 20.3   | 0.9555                        | -0.005   |
| 170        | 0.9838  | 20.3   | 0.9538                        | 0.004    |
| 180        | 0.9825  | 20.4   | 0.9535                        | 0.005    |
| 210        | 0.9809  | 20.5   | 0.9546                        | 0.002    |
| 220        | 0.9793  | 20.5   | 0.9552                        | -0.002   |
| 240        | 0.9773  | 20.6   | 0.9538                        | 0.007    |
| 250        | 0.9757  | 20.6   | 0.9459                        | 0.042    |
| 254        | 0.9740  | 20.7   | 0.9525                        | 0.014    |

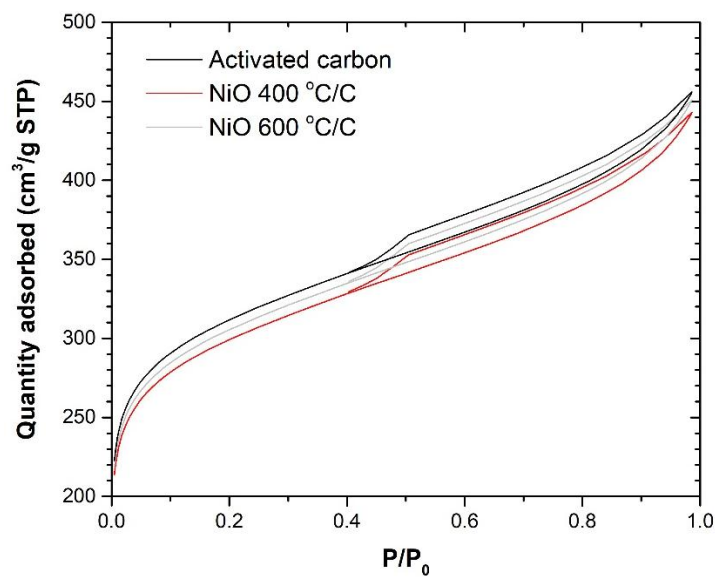

Figure S2 – N<sub>2</sub> adsorption-desorption isotherms of activated carbon and NiO 400 °C and NiO 600 °C nanoparticles supported on activated carbon.

Table S3 – Specific surface area and pore volume values derived from the N<sub>2</sub> adsorption-desorption isotherms.

| Sample       | BET surface area (m <sup>2</sup> /g) | BJH adsorption average pore width (Å) | BJH desorption average pore width (Å) |
|--------------|--------------------------------------|---------------------------------------|---------------------------------------|
| Activated C  | 1161                                 | 35                                    | 65                                    |
| NiO 400 °C/C | 1111                                 | 35                                    | 65                                    |
| NiO 600 °C/C | 1137                                 | 35                                    | 65                                    |

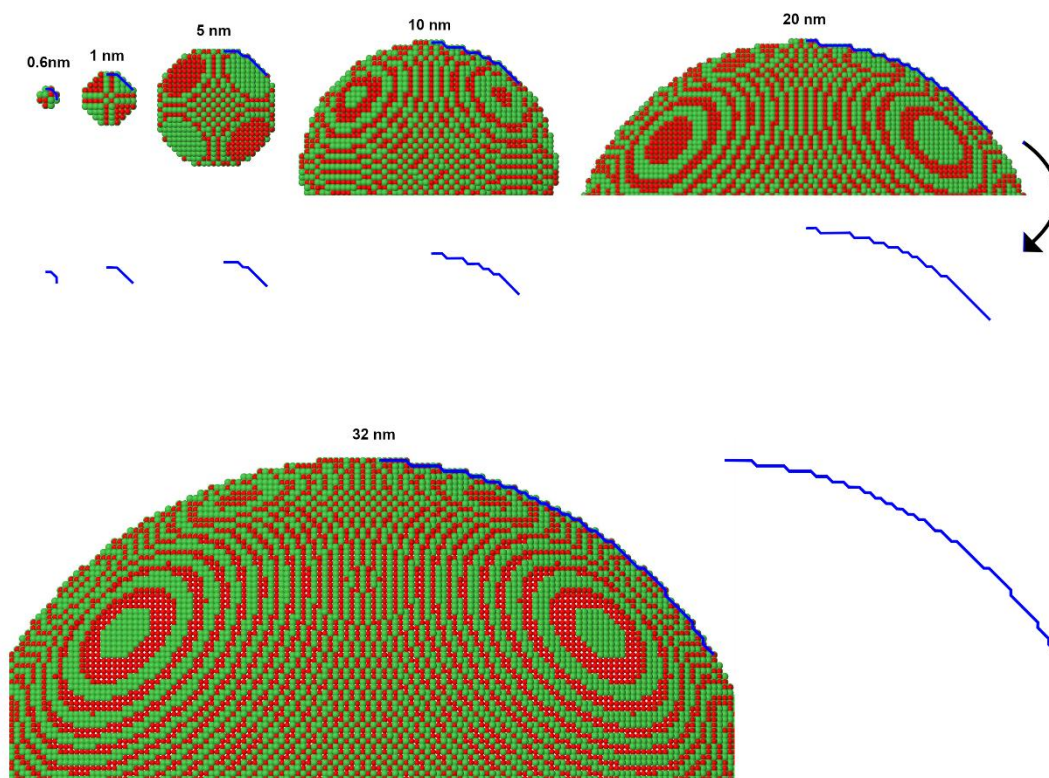

Figure S3 – Schematic representation of the NiO clusters used in the DFT calculations highlighting the changes on the surface curvature with the cluster size (blue line).

Table S4 – Lognormal distribution parameters obtained from the SAXS analysis of the NiO nanoparticles. The parameters are defined from the lognormal distribution curve where

$$y(x) = Nx^{-p} e^{-(\ln(x) - \ln(\mu))^2 / 2\sigma^2}$$

| Sample     | N    | p | $\mu$ | $\sigma$ | Diameter (nm) | Standard deviation (nm) |
|------------|------|---|-------|----------|---------------|-------------------------|
| NiO 400 °C | 0.99 | 1 | 5.78  | 0.42     | 13            | 5.6                     |
| NiO 450 °C | 1.04 | 1 | 7.50  | 0.44     | 17            | 7.6                     |
| NiO 500 °C | 1.00 | 1 | 10.10 | 0.41     | 22            | 9.4                     |
| NiO 550 °C | 0.99 | 1 | 12.35 | 0.42     | 27            | 11.9                    |
| NiO 600 °C | 0.98 | 1 | 14.50 | 0.41     | 32            | 13.5                    |

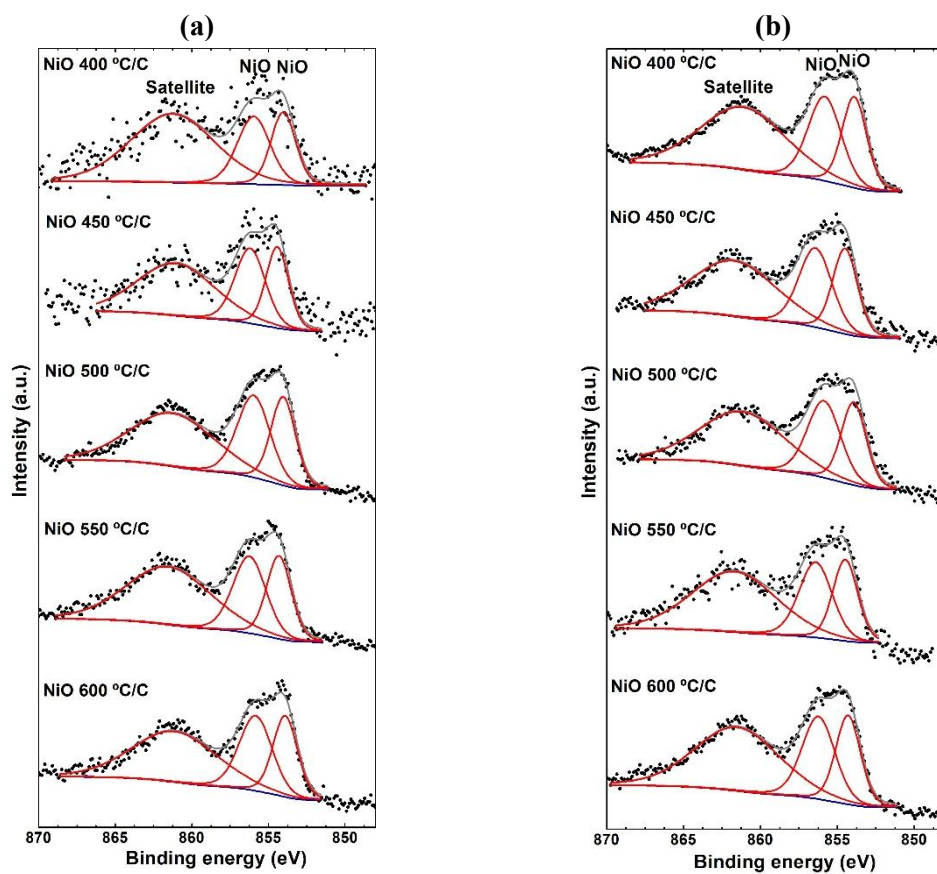

Figure S4 – XPS measurements at the Ni  $2p_{3/2}$  region of the 8 wt.% NiO/C nanoparticles (a) before and (b) after the  $H_2$  adsorption experiment.

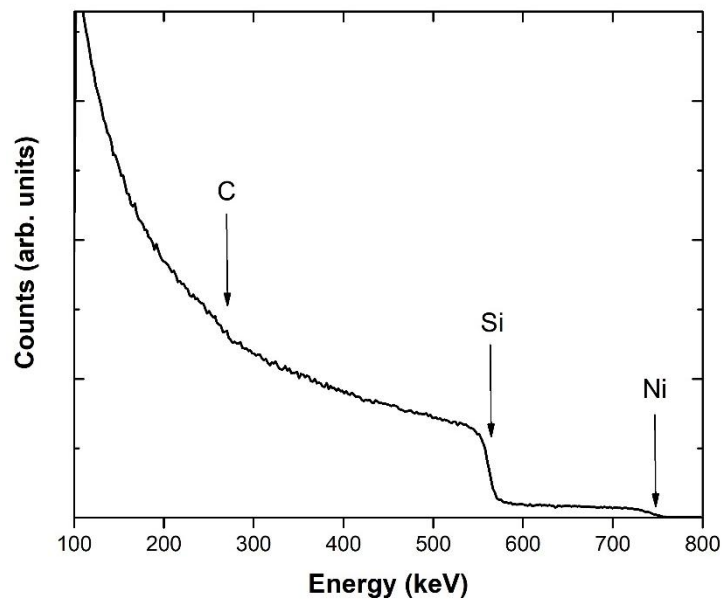

Figure S5 – Typical RBS measurement of the 1 wt.% NiO 550 °C/C nanoparticles film prepared over a Si substrate.

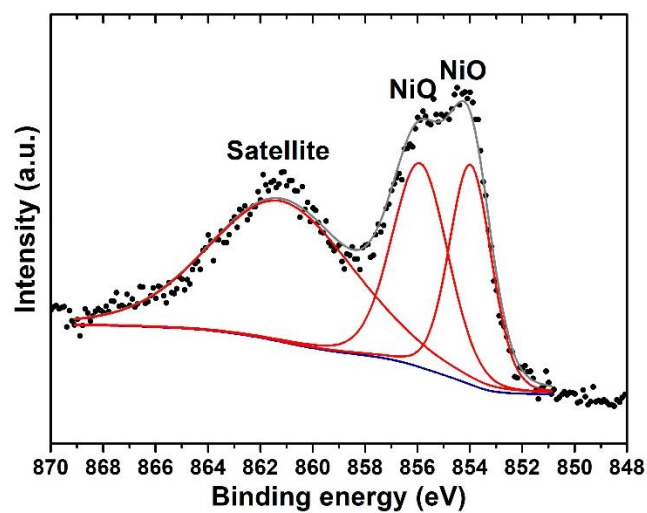

Figure S6 – XPS measurement at the Ni  $2p_{3/2}$  region of the 8 wt.% NiO 400 °C/C nanoparticles immediately after the H<sub>2</sub> adsorption experiment, with a short atmosphere exposition (around 5 min).

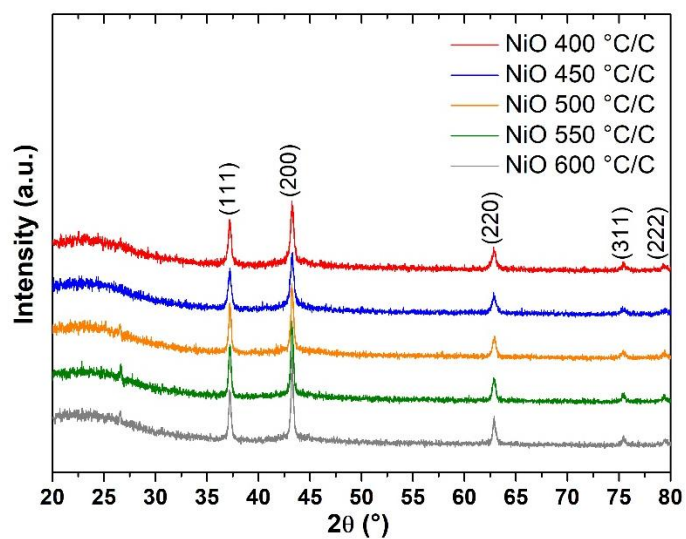

Figure S7 – XRD measurements of the 8 wt.% NiO/C nanoparticles after H<sub>2</sub> adsorption measurements.

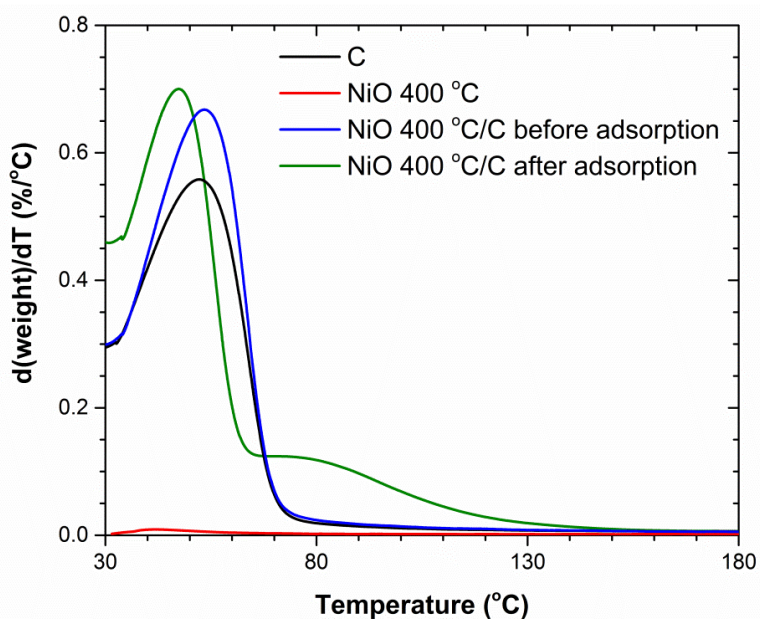

Figure S8 – TGA measurement showing the derivative of the weight with relation to the temperature of the samples before and after H<sub>2</sub> adsorption together with the activated carbon alone for comparison purposes.

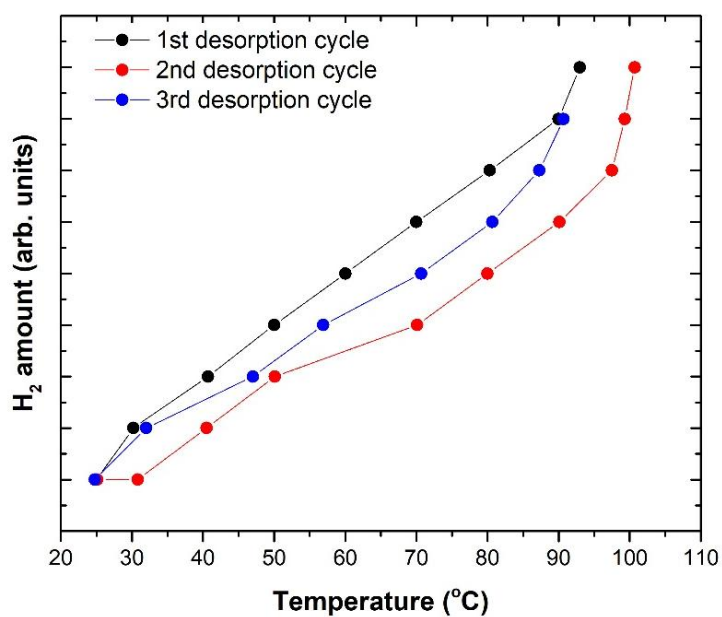

Figure S9 – H<sub>2</sub> desorption profile during heating under Ar atmosphere to around 95 °C of NiO 400 °C/C sample.

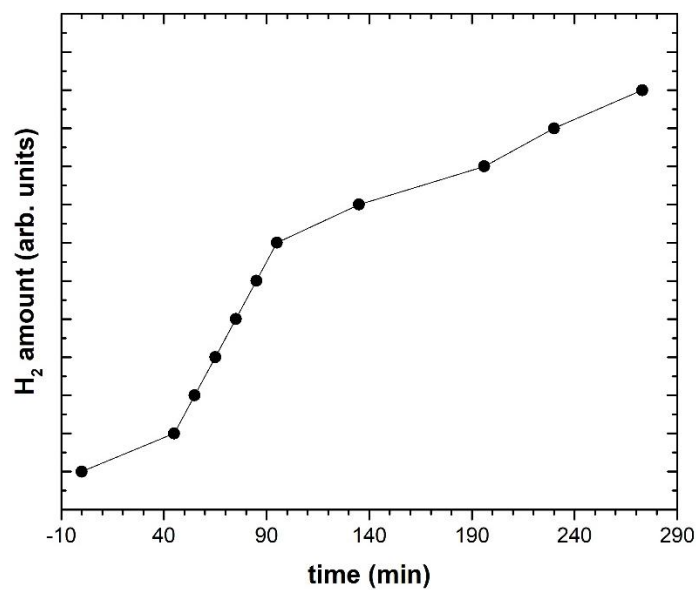

Figure S10 – H<sub>2</sub> desorption profile at a fixed temperature of 95 °C as a function of time for the NiO 400 °C/C sample.

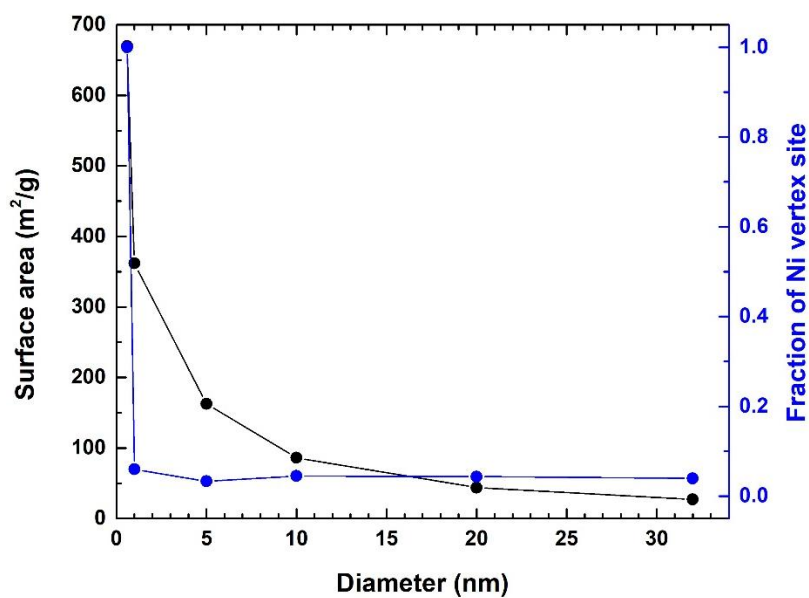

Figure S11 – Calculus of the specific surface area and fraction of Ni vertex site at the surface as a function of the NiO nanoparticle size.

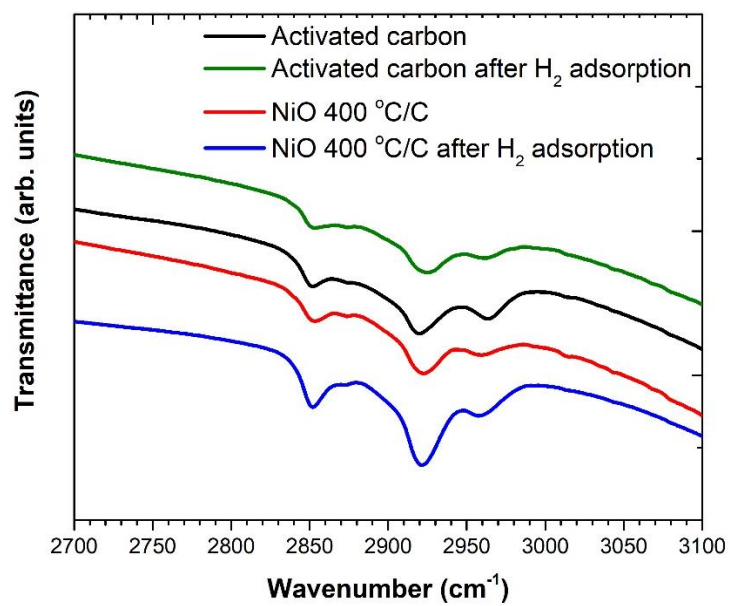

Figure S12 – FTIR measurements of the NiO 400 °C/C nanoparticles and activated C before and after H<sub>2</sub> adsorption measurement.
